# Supplementary material
Source: publisher figshare collection journal article supplement (https://acs.figshare.com/ndownloader/files/5745402)
Supplement: Supplementary file 1 [file 5745402]

Supporting Information for

**Single Molecular Imaging of Iron-Phthalocyanine Catalyzed Oxygen Reduction Reaction by *in situ* Scanning Tunneling Microscopy**

Jing-Ying Gu<sup>§</sup>, Zhen-Feng Cai<sup>§</sup>, Dong Wang\*, and Li-Jun Wan\*

<sup>§</sup>These authors contributed equally.

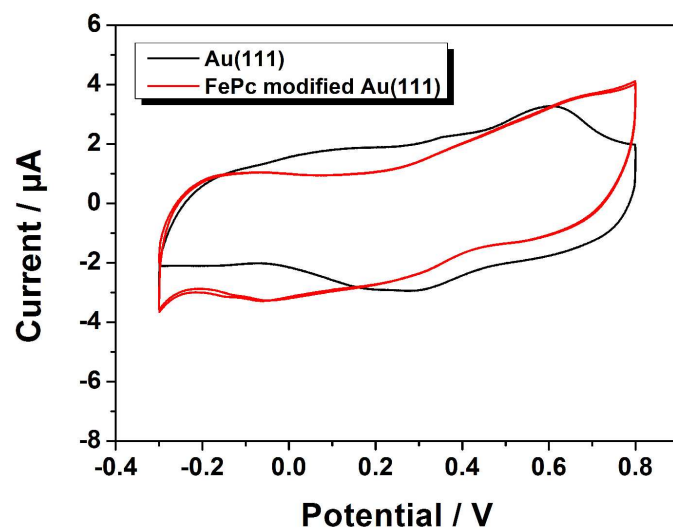

Figure S1. Typical cyclic voltammograms of bare (black line) and FePc-modified (red line) Au(111) electrodes in 0.1  $\text{HClO}_4$  saturated by nitrogen. Scan rate is 50 mV/s.

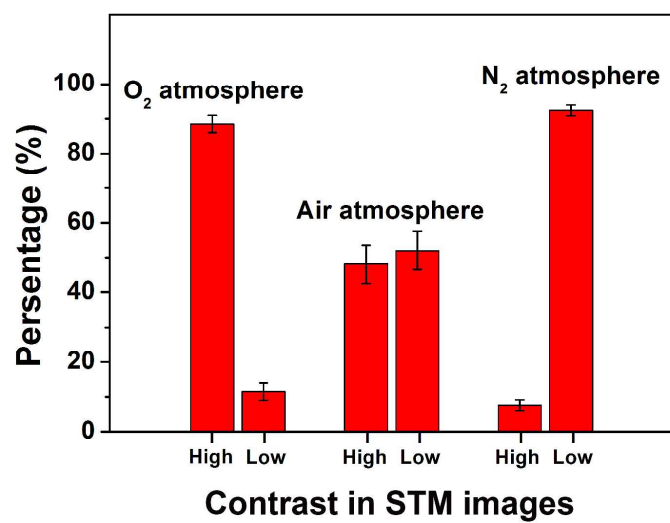

Figure S2. Histograms of the percentage of high-contrast spots and low-contrast spots in 0.1 M HClO<sub>4</sub> saturated by air, O<sub>2</sub> and N<sub>2</sub>.

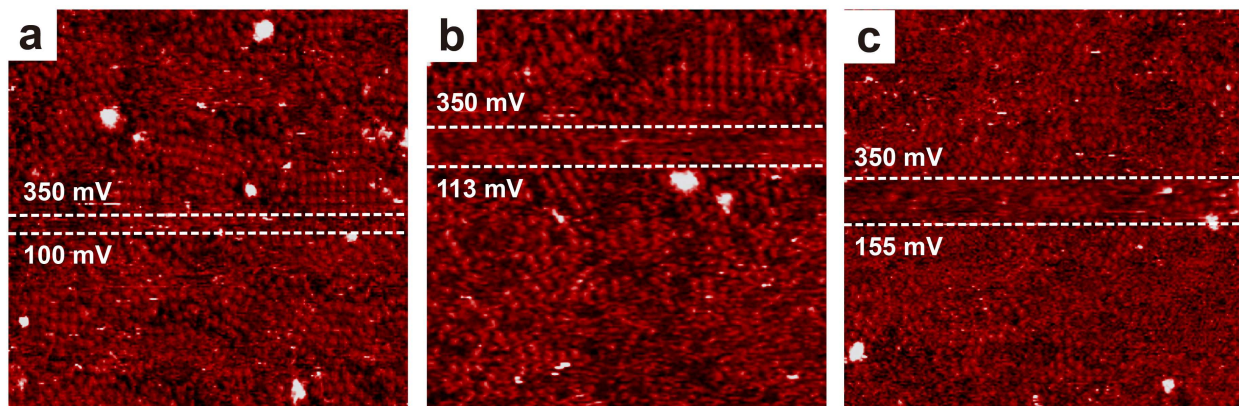

Figure S3. Sequential STM images of the FePc monolayer on Au(111) in 0.1 M HClO<sub>4</sub> saturated by nitrogen at different potential. Image conditions: (a) Upper region:  $E = 350$  mV,  $E_{\text{bias}} = -278.0$  mV,  $I_t = 1.000$  nA, data scale = 500.0 pm. Lower region:  $E = 100$  mV,  $E_{\text{bias}} = -278.0$  mV,  $I_t = 1.000$  nA, data scale = 500.0 pm; (b) Upper region:  $E = 350$  mV,  $E_{\text{bias}} = -278.0$  mV,  $I_t = 1.000$  nA, data scale = 500.0 pm. Lower region:  $E = 113$  mV,  $E_{\text{bias}} = -278.0$  mV,  $I_t = 1.000$  nA, data scale = 500.0 pm; (c) Upper region:  $E = 350$  mV,  $E_{\text{bias}} = -278.0$  mV,  $I_t = 1.000$  nA, data scale = 500.0 pm. Lower region:  $E = 115$  mV,  $E_{\text{bias}} = -278.0$  mV,  $I_t = 1.000$  nA, data scale = 500.0 pm.

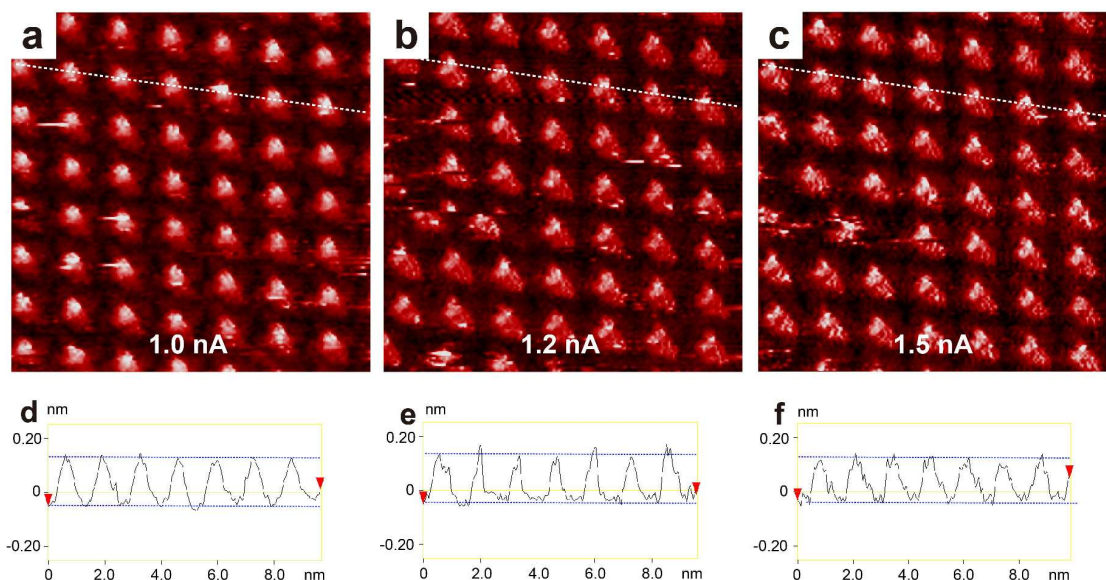

Figure S4. Sequential STM images and cross-section profiles of the FePc monolayer on Au(111) in 0.1 M  $\text{HClO}_4$  saturated by oxygen at different set-current. (d – f) are cross-section profiles along the white dotted line in (a – c). Image conditions: (a)  $E = 306$  mV,  $E_{\text{bias}} = -184.0$  mV,  $I_t = 1.000$  nA, data scale = 500.0 pm; (b)  $E = 306$  mV,  $E_{\text{bias}} = -184.0$  mV,  $I_t = 1.200$  nA, data scale = 500.0 pm; (c)  $E = 306$  mV,  $E_{\text{bias}} = -184.0$  mV,  $I_t = 1.500$  nA, data scale = 500.0 pm.

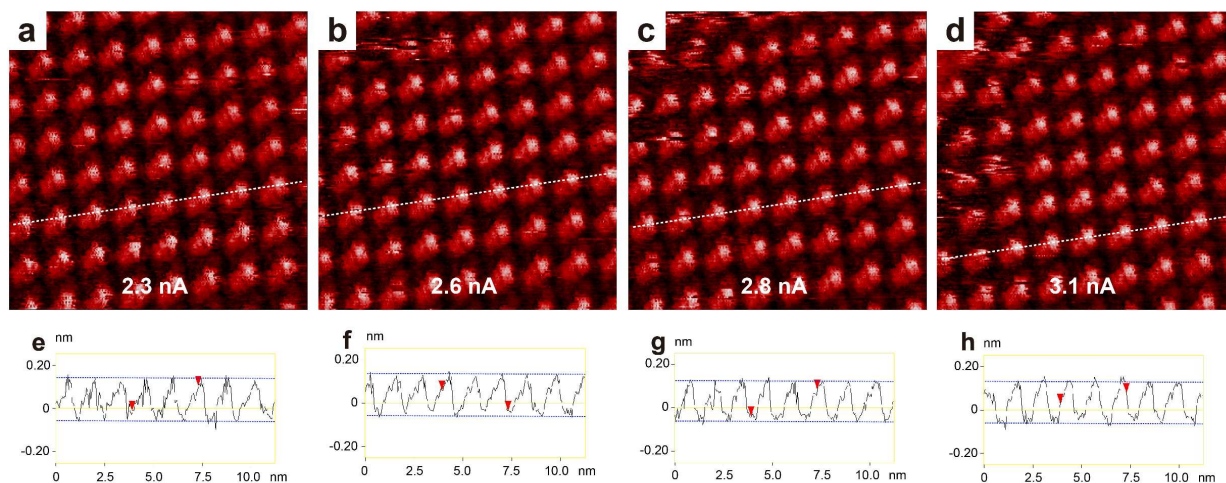

Figure S5. Sequential STM images and cross-section profiles of the FePc monolayer on Au(111) in 0.1 M HClO<sub>4</sub> saturated by oxygen at different set-current. (e – h) are cross-section profiles along the white dotted line in (a – d). Image conditions: (a)  $E = 306$  mV,  $E_{\text{bias}} = -339.0$  mV,  $I_t = 1.000$  nA, data scale = 500.0 pm; (b)  $E = 306$  mV,  $E_{\text{bias}} = -339.0$  mV,  $I_t = 1.200$  nA, data scale = 500.0 pm; (c)  $E = 306$  mV,  $E_{\text{bias}} = -184.0$  mV,  $I_t = 1.500$  nA, data scale = 500.0 pm; (d)  $E = 306$  mV,  $E_{\text{bias}} = -339.0$  mV,  $I_t = 1.200$  nA, data scale = 500.0 pm.

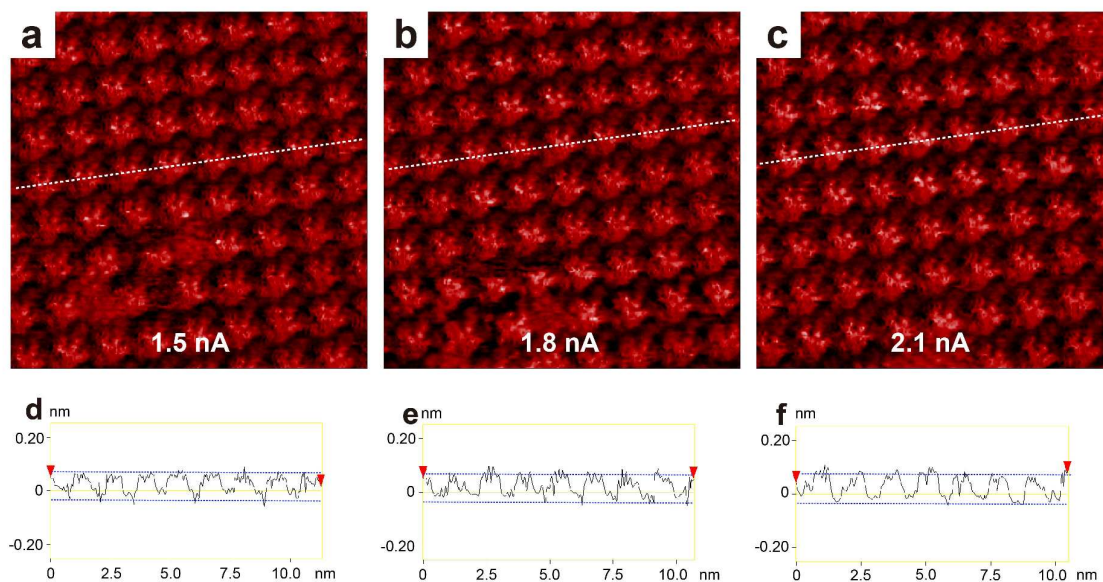

Figure S6. Sequential STM images and cross-section profiles of the FePc monolayer on Au(111) in 0.1 M  $\text{HClO}_4$  saturated by nitrogen at different set-current. (d – f) are cross-section profiles along the white dotted line in (a – c). Image conditions: (a)  $E = 292$  mV,  $E_{\text{bias}} = -281.0$  mV,  $I_t = 1.500$  nA, data scale = 500.0 pm; (b)  $E = 292$  mV,  $E_{\text{bias}} = -281.0$  mV,  $I_t = 1.800$  nA, data scale = 500.0 pm. (c)  $E = 292$  mV,  $E_{\text{bias}} = -281.0$  mV,  $I_t = 2.100$  nA, data scale = 500.0 pm.



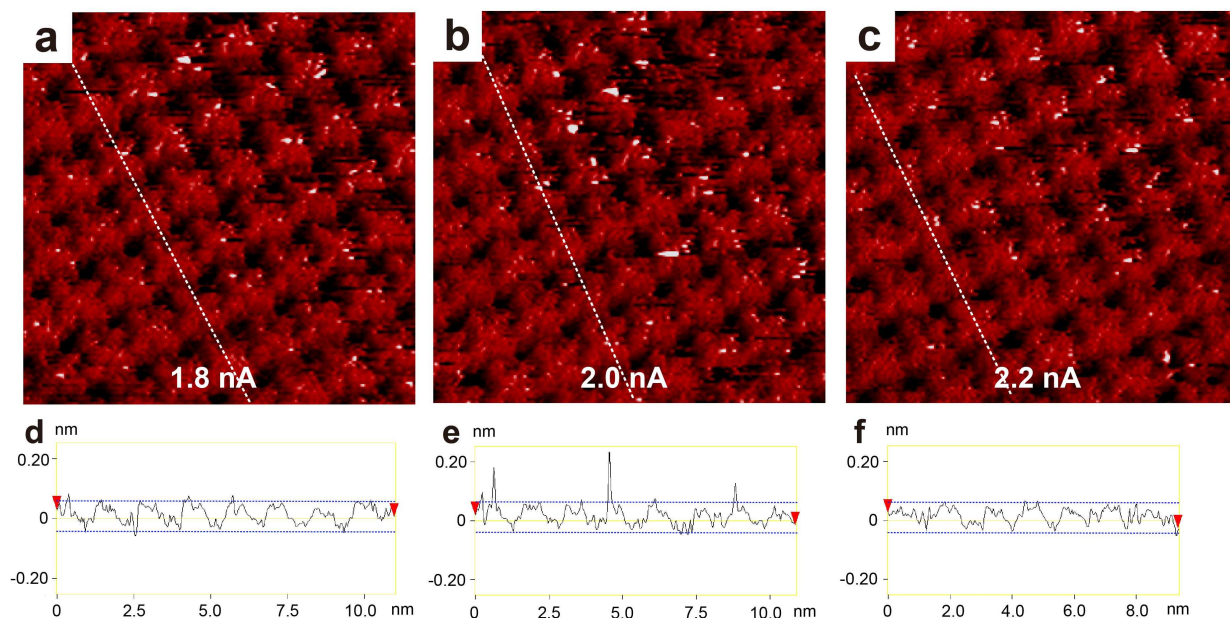

Figure S7. Sequential STM images and cross-section profiles of the FePc monolayer on Au(111) in 0.1 M  $\text{HClO}_4$  saturated by nitrogen at different set-current. (d – f) are cross-section profiles along the white dotted line in (a – c). Image conditions: (a)  $E = 306$  mV,  $E_{\text{bias}} = -490.0$  mV,  $I_t = 1.800$  nA, data scale = 500.0 pm; (b)  $E = 306$  mV,  $E_{\text{bias}} = -490.0$  mV,  $I_t = 2.000$  nA, data scale = 500.0 pm; (c)  $E = 306$  mV,  $E_{\text{bias}} = -490.0$  mV,  $I_t = 2.200$  nA, data scale = 500.0 pm.



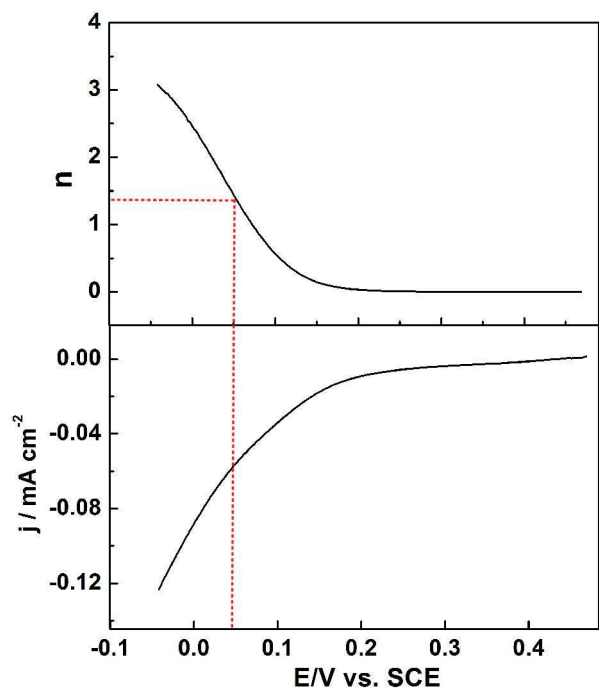

Figure S8. Steady-state ORR polarization curve (bottom) in O<sub>2</sub>-saturated 0.1 M HClO<sub>4</sub> at a scan rate of 10 mV s<sup>-1</sup> and corresponding electron transfer number (n, top) during ORR process catalyzed by FePc modified Au(111) surface.

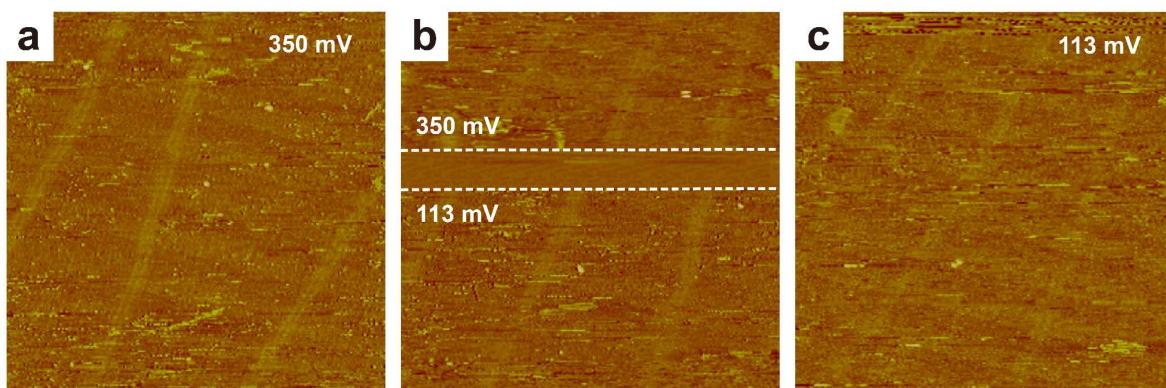

Figure S9. Sequential STM images of the Au(111) single-crystal substrate in 0.1 M HClO<sub>4</sub> saturated by oxygen at different potential. Image conditions: (a)  $E = 350$  mV,  $E_{\text{bias}} = -116.0$  mV,  $I_t = 1.000$  nA; (b) Upper region:  $E = 350$  mV,  $E_{\text{bias}} = -116.0$  mV,  $I_t = 1.000$  nA. Lower region:  $E = 113$  mV,  $E_{\text{bias}} = -55.3$  mV,  $I_t = 1.000$  nA; (c)  $E = 113$  mV,  $E_{\text{bias}} = -55.3$  mV,  $I_t = 1.000$  nA.
